# Supplementary material for: Lithium-ion batteries: direct solid sampling for characterisation of black mass recyclates using graphite furnace atomic absorption spectrometry
Source: Royal Society of Chemistry journal article supplement (doi:10.1039/d4ja00207e), 2024-01-01
Supplement: d4ja00207e1.pdf [file d4ja00207e1.pdf]

## Supplementary Information

# Lithium-ion batteries: direct solid sampling for characterisation of black mass recyclates using graphite furnace atomic absorption spectrometry

Maria Dommaschk,\* Tim Sieber, and Jörg Acker

Brandenburg University of Technology Cottbus-Senftenberg, Department of Physical Chemistry, 01968 Senftenberg, Germany.  
E-mail: Maria.Dommaschk@b-tu.de

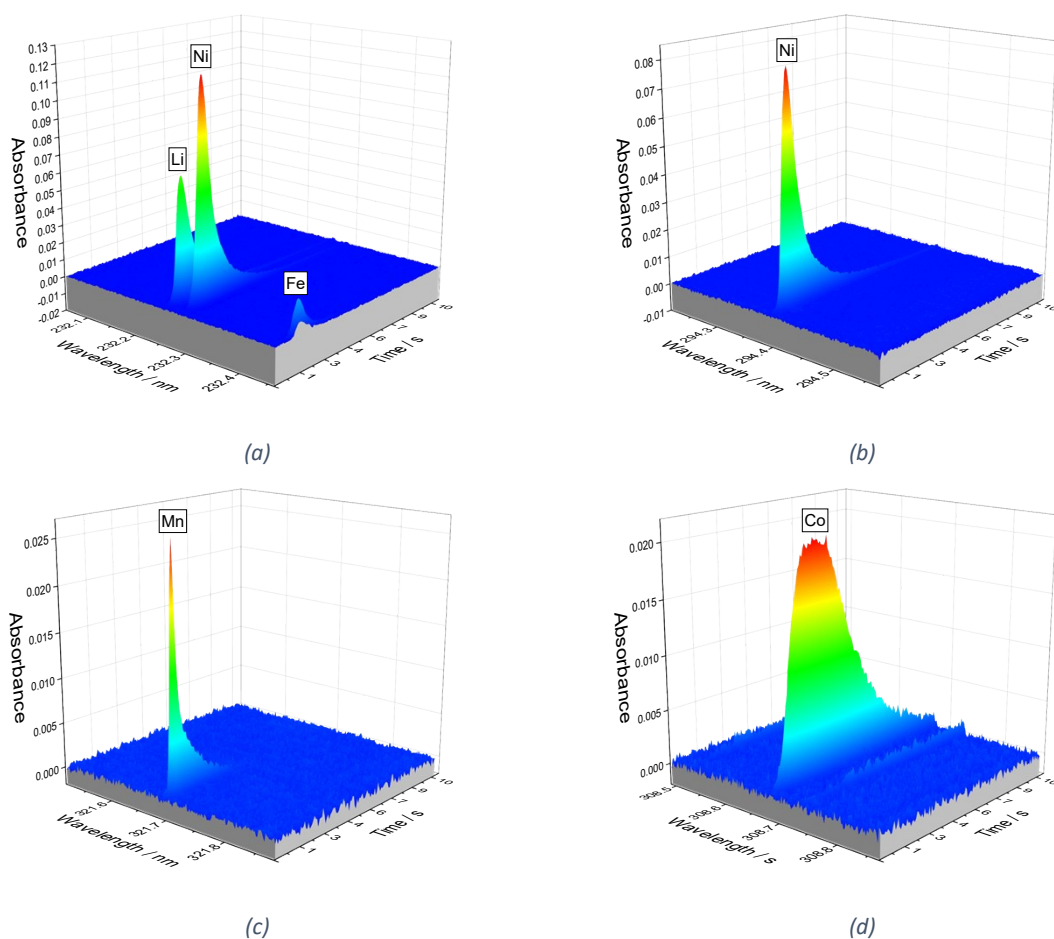

**Supplementary Figure S 1.** Time- and wavelength-resolved absorption spectra for about 0.4 mg of solid NMC standard in the vicinity of the (a) Li line at 323.2657 nm (b) Ni line at 294.3912 nm (c) Mn line at 321.6945 nm and (d) Co line at 308.6792 nm using the optimised temperature programme for solid analysis with HR-CS GF AAS.

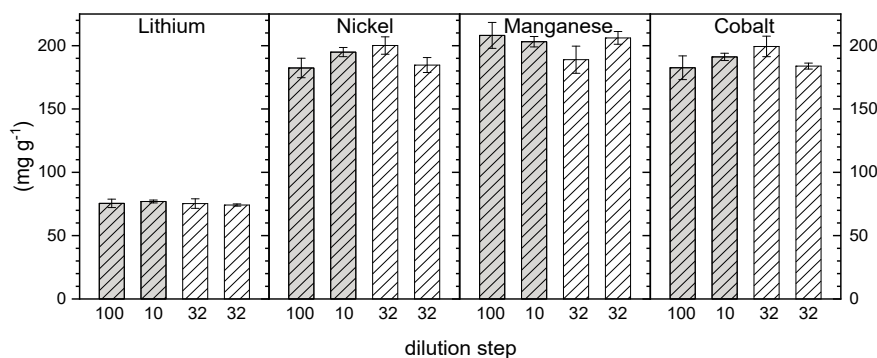

**Supplementary Figure S 2.** Analytical contents ( $n = 5$ ) for lithium, nickel, manganese and cobalt in NMC/graphite solid dilutions with the successive dilution factors 100/10 and 32/32 (dilution factor 1/dilution factor 2) in  $\text{mg g}^{-1}$ . The solid samples were dissolved wet-chemically and analysed with ICP-OES. The measurement uncertainty corresponds to  $1\sigma$ .

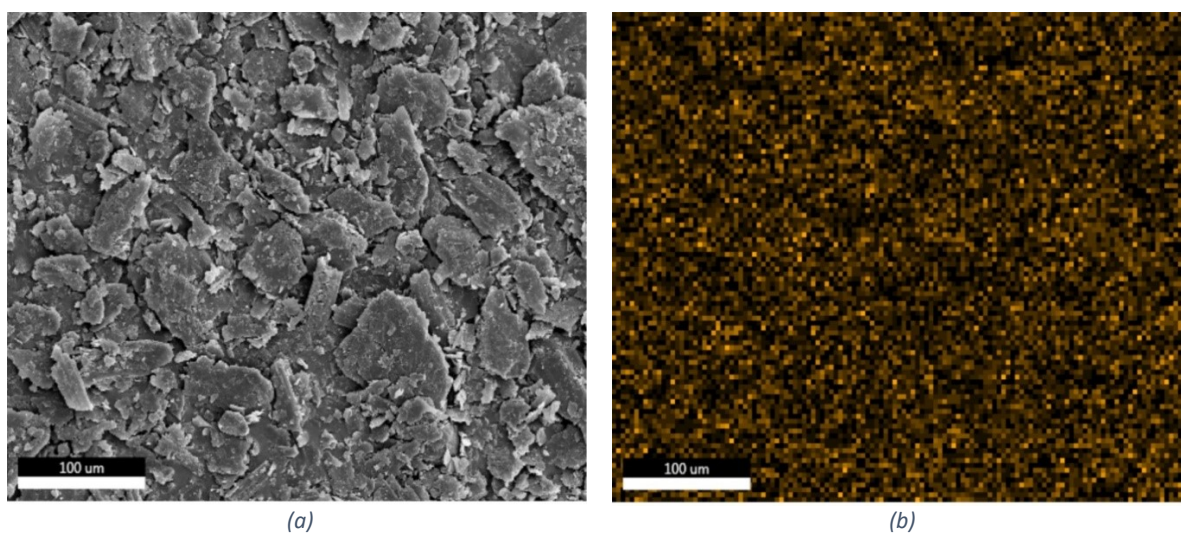

**Supplementary Figure S 3.** 111NMC/Graphite material (dilution factor 1000): SEM micrograph (a) Magnification 264X, (b) EDX element mapping for nickel indicated by yellow color.

**Supplementary Table S 1** Calculated stoichiometric ratios of NMC (mean  $\pm$  standard deviation,  $n = 3$ ) for the determination of Li, Ni, Mn and Co ( $\text{mg g}^{-1}$ ) in the certified reference material “BAM-S014 Li-NMC 111 Cathode Material” and in various recyclates of cathode coatings.

|                               |           | Stoichiometric factors |                 |                 |                 |
|-------------------------------|-----------|------------------------|-----------------|-----------------|-----------------|
| Sample                        |           | Li                     | Ni              | Mn              | Co              |
| CRM<br>BAM-S014<br>Li-NMC 111 | Found     | $1.25 \pm 0.49$        | $0.32 \pm 0.10$ | $0.34 \pm 0.10$ | $0.34 \pm 0.10$ |
|                               | ICP-OES   | $1.11 \pm 0.01$        | $0.33 \pm 0.01$ | $0.33 \pm 0.10$ | $0.34 \pm 0.01$ |
|                               | Certified | $1.09 \pm 0.21$        | $0.34 \pm 0.06$ | $0.33 \pm 0.06$ | $0.33 \pm 0.07$ |
| Recyclate 1                   | Found     | $0.91 \pm 0.37$        | $0.41 \pm 0.13$ | $0.31 \pm 0.09$ | $0.28 \pm 0.10$ |
|                               | ICP-OES   | $0.95 \pm 0.01$        | $0.41 \pm 0.01$ | $0.29 \pm 0.00$ | $0.30 \pm 0.00$ |
| Recyclate 2                   | Found     | $0.55 \pm 0.21$        | $0.39 \pm 0.12$ | $0.31 \pm 0.10$ | $0.30 \pm 0.10$ |
|                               | ICP-OES   | $0.63 \pm 0.01$        | $0.41 \pm 0.01$ | $0.29 \pm 0.01$ | $0.30 \pm 0.01$ |
| Recyclate 3                   | Found     | $0.78 \pm 0.08$        | $0.39 \pm 0.12$ | $0.28 \pm 0.02$ | $0.33 \pm 0.03$ |
|                               | ICP-OES   | $0.84 \pm 0.01$        | $0.41 \pm 0.01$ | $0.29 \pm 0.00$ | $0.30 \pm 0.00$ |
| Recyclate 4                   | Found     | $0.85 \pm 0.38$        | $0.57 \pm 0.21$ | $0.23 \pm 0.08$ | $0.20 \pm 0.09$ |
|                               | ICP-OES   | $1.09 \pm 0.05$        | $0.61 \pm 0.02$ | $0.21 \pm 0.01$ | $0.19 \pm 0.01$ |
